# Supplementary material for: Prediction and diagnosis of renal cell carcinoma using nuclear magnetic resonance-based serum metabolomics and self-organizing maps
Source: PubMed Central journal article supplement (PMC5312304; doi:10.18632/oncotarget.10830), 2016-07-24
Supplement: oncotarget-07-59189-s001.pdf [file oncotarget-07-59189-s001.pdf]

## Prediction and diagnosis of renal cell carcinoma using nuclear magnetic resonance-based serum metabolomics and self-organizing maps

### Supplementary Materials

**Table S1: Assignment of metabolites in <sup>1</sup>H NMR spectra from human serum samples**

| No. | Compound     | ppm                  | Assignment                                                                                                                                                                                   | Multiplicity |
|-----|--------------|----------------------|----------------------------------------------------------------------------------------------------------------------------------------------------------------------------------------------|--------------|
| 1   | LDL/VLDL     | 0.84–0.91, 1.22–1.31 | CH <sub>3</sub> (CH <sub>2</sub> ) <sub>n</sub> /CH <sub>3</sub> CH <sub>2</sub> CH <sub>2</sub> C =,<br>(CH <sub>2</sub> ) <sub>n</sub> /CH <sub>2</sub> CH <sub>2</sub> CH <sub>2</sub> CO | m, m         |
| 2   | isoleucine   | 0.92–0.93, 1.00–1.02 | d-CH <sub>3</sub> , b-CH <sub>3</sub>                                                                                                                                                        | t, d         |
| 3   | leucine      | 0.94–0.97            | d-CH <sub>3</sub>                                                                                                                                                                            | d, d         |
| 4   | valine       | 0.98–1.00, 1.03–1.05 | CH <sub>3</sub> , CH <sub>3</sub>                                                                                                                                                            | d, d         |
| 5   | lactate      | 1.32–1.35, 4.10–4.15 | CH <sub>3</sub> , CH                                                                                                                                                                         | d, q         |
| 6   | alanine      | 1.47–1.50            | CH <sub>3</sub>                                                                                                                                                                              | d            |
| 7   | lipids + NAC | 1.98–2.10            | -                                                                                                                                                                                            | m            |
| 8   | glutamine    | 2.42–2.48            | half g-CH <sub>2</sub>                                                                                                                                                                       | m            |
| 9   | creatine     | 3.04–3.05            | CH <sub>3</sub>                                                                                                                                                                              | s            |
| 10  | choline      | 3.20–3.22            | N(CH <sub>3</sub> ) <sub>3</sub>                                                                                                                                                             | s            |
| 11  | TMAO         | 3.26–3.27            | N(CH <sub>3</sub> ) <sub>3</sub>                                                                                                                                                             | s            |
| 12  | taurine      | 3.40–3.42            | CH <sub>2</sub>                                                                                                                                                                              | t            |
| 13  | sugars + AAs | 3.48–3.88            | various                                                                                                                                                                                      | m            |
| 14  | β-glucose    | 4.63–4.67            | CH                                                                                                                                                                                           | d            |
| 15  | α-glucose    | 5.22–5.25            | CH                                                                                                                                                                                           | d            |
| 16  | poly-UFA     | 5.26–5.36            | CH = CHCH <sub>2</sub> CH = CH, =<br>CHCH <sub>2</sub> CH <sub>2</sub>                                                                                                                       | m            |

Abbreviations: s, singlet; d, doublet; t, triplet; q, quartet; m, multiplet; LDL, low density lipid; VLDL, very low density lipid; NAC, *N*-acetyl signals from α<sub>1</sub>-acid glycoproteins; TMAO, *N*-oxide trimethylamine; AA, amino acid.
